# Supplementary material for: Frailty-Preventing Effect of an Intervention Program Using a Novel Complete Nutritional “COMB-FP Meal”: A Pilot Randomized Control Trial
Source: Nutrients. 2023 Oct 10;15(20):4317. doi: 10.3390/nu15204317 (PMC10609752; doi:10.3390/nu15204317)
Supplement: Supplementary file 1 [file nutrients-15-04317-s001.zip]

Archive with 4 entries (4 files):
- Supplemental_text.pdf
- Supplementary_figure1.pptx
- Supplementary_table1.pdf
- Supplementary_table2,3,4,5.xlsx
