# Supplementary material for: Frailty-Preventing Effect of an Intervention Program Using a Novel Complete Nutritional “COMB-FP Meal”: A Pilot Randomized Control Trial
Source: Nutrients. 2023 Oct 10;15(20):4317. doi: 10.3390/nu15204317 (PMC10609752; doi:10.3390/nu15204317)
Supplement: Supplementary file 1 [file nutrients-15-04317-s001.zip › Supplementary_table2,3,4,5.xlsx]

## Sheet: supplementary_2旧
	Supplemental2 All menu of tested meal
	Breakfast		Lunchbox
	"Cocoa and banana flavored poundcake" and "Apple and tometo smoothie"		Grilled salmon with salt koji luchbox	Chinjaolose lunchbox
	"Peer and cheese flavored pound cake" and "Banana and mango smoothie"		Chicken nanban (Japanese traditional fried chicken with vinegar and tartar sauce) lunch box	Grilled salmon lunchbox
	"Chicken rice ball" and "Miso sou"		Grilled pork ginger lunchbox	Beef curry
	"Green soybean riceball" and "Miso soup with pork and vegetables"		Fried chicken lunchbox	Western-style stir-fried shrimp and vegetables luchbox
	"Cheese and mushroom risotto"		Ketchup-based spaghetti	Bolognese spaghetti
	"Tomato risotto"		Twice cooked pork lunchbox	Pork Chops lunchbox
			Lunchbox
			Salmon Teriyaki lunchbox	Japanese mackerel grilled with Japanese pepper lunchbox
			Black vinegar pork lunch box	Stir-fried pork and deep-fried tofu with chili bean sauce
			Demi-glace hamburg steak lunch box	Stri-firied pork with mustard lunch box
			Dry curry with pea lunch box	Beef bowl
			Omelette rice	Grilled salmon with tartare sauce luch box
			Stir-fried Pork with Green Onion lunchbox	Fried rice

## Sheet: supplementary_2
	Supplementary table 2 All menu of test meal
	"Cocoa and banana flavored poundcake" and "Apple and tometo smoothie"	Tomato risotto	Chinjaolose lunchbox	Salmon Teriyaki lunchbox
	"Peer and cheese flavored poundcake" and "Banana and mango smoothie"	Grilled salmon with salt koji luchbox	Beef curry	Demi-glace hamburg steak lunchbox
	"Chicken rice ball" and "Miso soup"	Chicken nanban (Japanese traditional fried chicken with vinegar and tartar sauce) lunchbox	Western-style stir-fried shrimp and vegetables luchbox	Dry curry with pea lunch box
	"Green soybean riceball" and "Miso soup with pork and vegetables"	Fried chicken lunchbox	Bolognese spaghetti	Beef bowl
	Cheese and mushroom risotto	Twice cooked pork lunchbox	Pork Chops lunchbox	Salt-grilled mackerel luchbox

## Sheet: supplementary_3
Supplementary table 3 Results of acitivty monitor and FFQ during the trial.
(A) Activity monitor
	unit			n		Week 0				Week 12				p		⊿		p
														(week 0 vs week12)		95%CI
Total burned calories	kcal/day	Control		50		1888	±	356		1897	±	427		0.4601		34		0.389
		Test		43		1836	±	360		1888	±	410		0.1114		(-44 ~ 111)
Active calories	kcal/day	Control		50		582	±	249		580	±	264		0.951		9		0.7881
		Test		43		577	±	196		571	±	178		0.6458		(-56 ~ 74)
(B) FFQ
	unit			n		Week 0				Week 12				p		⊿		p
														(week 0 vs week12)		95%CI
Energy intake	kcal/day	Control		50		1930	±	444		1958	±	481		0.4785		62		0.3892
		Test		43		2021	±	532		1987	±	458		0.5901		(-80 ~ 203)

## Sheet: supplementary_4
	Supplementary table 4 Secondary outcomes
		unit			n		Week 0				Week 12				⊿		p
															95%CI
	Body muscle mass	kg	Control		50		41.494	±	7.86416		41.56	±	7.70788		0.117721		0.6107
			Test		43		40.9186	±	8.21298		41.1023	±	8.30303		(-0.3 ~ 0.6)
	Body muscle ratio	%	Control		50		65.9851	±	7.87657		66.5142	±	8.08733		0.45654		0.251486
			Test		43		66.2293	±	7.3317		67.215	±	7.41414		(-0.3 ~ 1.2)
	Trunk muscle mass	kg	Control		50		19.728	±	3.81849		19.574	±	3.74977		0.147023		0.3527
			Test		43		19.2186	±	4.38874		19.2116	±	4.05153		(-0.2 ~ 0.5)
	Right arm muscle mass	kg	Control		50		2.2868	±	0.63403		2.2552	±	0.614084		0.0146233		0.54
			Test		43		2.21209	±	0.721901		2.19512	±	0.679031		(-0.0 ~ 0.1)
	Left arm muscle mass	kg	Control		50		2.238	±	0.63553		2.207	±	0.626937		0.0277442		0.3261
			Test		43		2.13186	±	0.685716		2.1286	±	0.630852		(-0.0 ~ 0.1)
	Right leg muscle mass	kg	Control		50		6.9026	±	1.46003		6.9324	±	1.42654		0.0571767		0.3659
			Test		43		6.78465	±	1.57021		6.87163	±	1.52102		(-0.1 ~ 0.2)
	Left leg muscle mass	kg	Control		50		6.9296	±	1.47336		6.9324	±	1.42654		0.0579581		0.3718
			Test		43		6.7714	±	1.55917		6.83395	±	1.49674		(-0.1 ~ 0.2)
	Kihon check-list	point	Control		50		4.96	±	3.28857		3.22	±	2.33247		0.0888372		0.8303
			Test		43		5.02326	±	3.76379		3.37209	±	3.2807		-
	Revised J-CHS criteria	point	Control		50		1.04	±	0.72731		0.24	±	0.476381		0.148837		0.3705
			Test		43		1.02326	±	0.987743		0.372093	±	0.655499		-

## Sheet: supplementary_5
	Supplementary table 5 Reported adverse events
		Control	Test
	Tiredness	1
	Gum Inflammation		1
	Gastroenteritis	1
	Constipation	1
	Eyestrain	1
	Cold	1	1
	Shoulder pain		1
	Frozen shoulder		3
	Pain in right knee		1
	Test positive for COVID-19		1
	Pain in left thigh		1
	Pain in left back and armpit		1
	Pollinosis		7
	Backache	1
	Pain in left foot and lower back	1
	Pain in left leg	1
	Rash	1
	Buzzing in ears		3
	Feeling trouble in lifting legs		1
	Knee pain		1
	Achilles tendon rupture	1
	Sinusitis		1
	Pain in teeth		1
	Progressive palmar keratoderma		1
	Pain in left leg base and hip	1
	Pain in thigh	1
